# Supplementary material for: Similar chemical structures, dissimilar triplet quantum yields: a CASPT2 model rationalizing the trend of triplet quantum yields in nitroaromatic systems
Source: Royal Society of Chemistry journal article supplement (doi:10.1039/c9cp00705a), 2019-01-01
Supplement: c9cp00705a1.pdf [file c9cp00705a1.pdf]

Supporting Information  
(Total of 10 pages)  
for

**Similar chemical structures, dissimilar triplet quantum yields; CASPT2 model rationalizing the trend of triplet quantum yield in nitroaromatic systems.**

Angelo Giussani<sup>\*,†,‡</sup> and Graham A. Worth<sup>†</sup>

<sup>†</sup>Department of Chemistry, University College London, 20 Gordon Street, London WC1H 0AJ, U.K.

<sup>\*</sup>To whom correspondence should be addressed. Email: [Angelo.Giussani@uv.es](mailto:Angelo.Giussani@uv.es)

<sup>‡</sup>Current address: Instituto de Ciencia Molecular, Universitat de València, Apartado22085, ES-46071 Valencia, Spain

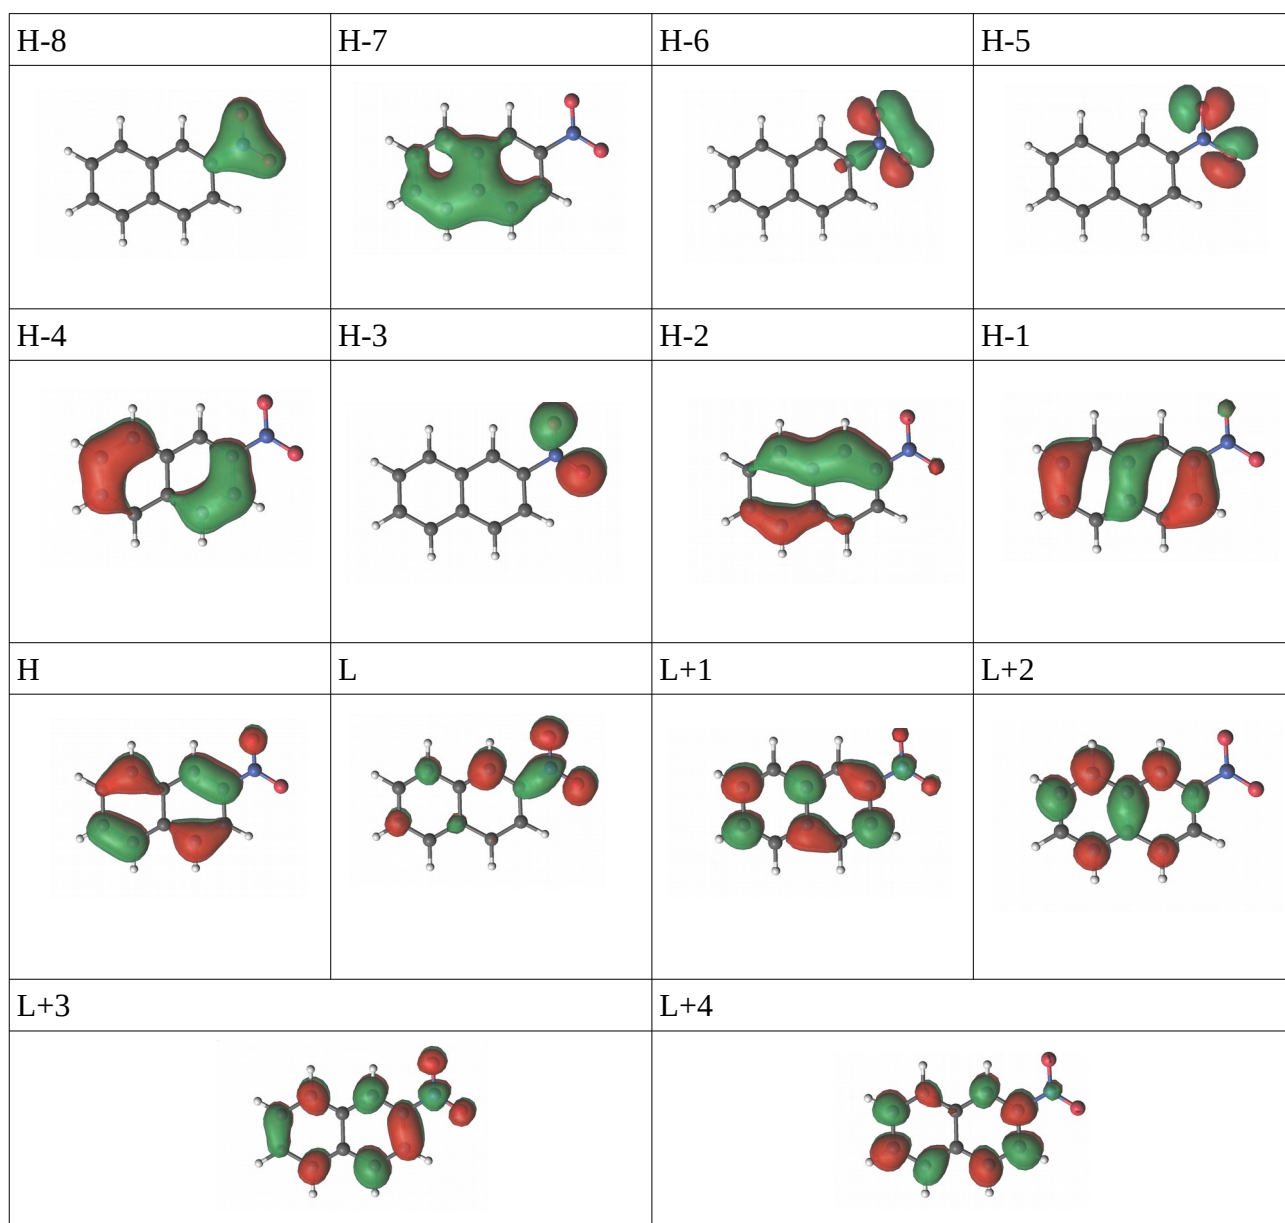

**Figure S1.** CAS(18,14) active space for 2NN, labeled accordingly to the topology of the Hartree-Fock orbitals. Topologically equivalent orbitals were used for 1NN and 2M1NN.

**Table S1.** Main configuration state functions (CSF) describing the low-lying excited states of 2NN at its ground state minimum.

| STATE                | CSF                                | Weight            |
|----------------------|------------------------------------|-------------------|
| $T_1^3(\pi\pi^*)$    | H -> L+3                           | 47%               |
| $T_2^3(n_A\pi^*)$    | H-5 -> L                           | 71%               |
| $T_3^3(\pi_o\pi^*)$  | H -> L<br>H-3 -> L                 | 12%<br>69%        |
| $S_1^1(n_A\pi^*)$    | H-5 -> L                           | 63%               |
| $T_4^3(\pi\pi^*)$    | H-> L<br>H-1 -> L+3                | 20%<br>28%        |
| $S_2^1(L_b\pi\pi^*)$ | H-1 -> L<br>H -> L+1<br>H-1 -> L+3 | 22%<br>22%<br>16% |
| $T_5^3(n_B\pi^*)$    | H-6 -> L<br>H-5, H-3 --> L         | 68%<br>12%        |
| $S_3^1(n_B\pi^*)$    | H-6 -> L                           | 61%               |
| $S_4^1(L_a\pi\pi^*)$ | H -> L<br>H -> L+3                 | 28%<br>11%        |

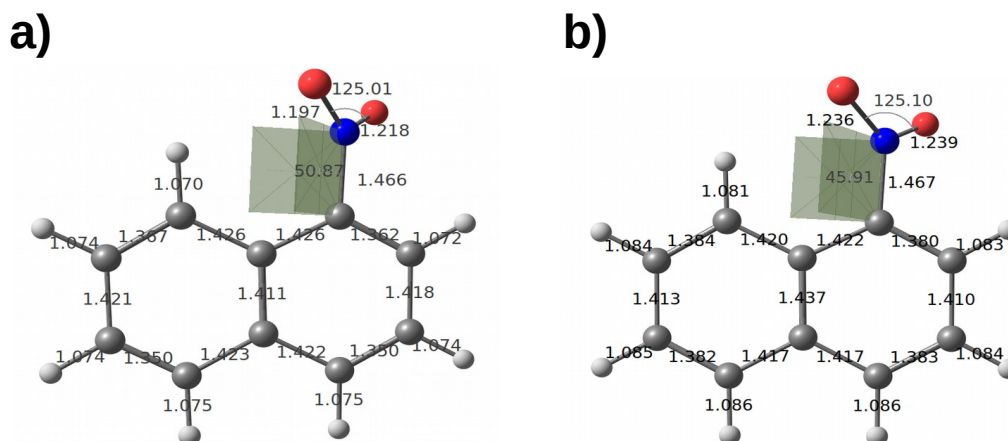

**Figure S2.** a) 1NN optimized geometry at the CASSCF level (J. Chem. Theory Comput. 2014, 10, 3987.); b) 1NN optimized geometry at the CASPT2(18,14) level. Selected bond lengths (in Å), angles, and dihedral angles (in degrees) are also reported.

**Table S2.** CASSCF(18,14) dipole moments for the singlet states of the three nitronaphthalene molecules at the corresponding ground state minima.

| 2NN                                              |                 | 1NN                                              |                 | 2M1NN                                            |                 |
|--------------------------------------------------|-----------------|--------------------------------------------------|-----------------|--------------------------------------------------|-----------------|
| State                                            | $\mu(\text{D})$ | State                                            | $\mu(\text{D})$ | State                                            | $\mu(\text{D})$ |
| S <sub>0</sub>                                   | 4.71            | S <sub>0</sub>                                   | 4.05            | S <sub>0</sub>                                   | 3.68            |
| S <sub>1</sub> <sup>1</sup> (n <sub>A</sub> π*)  | 2.53            | S <sub>1</sub> <sup>1</sup> (n <sub>A</sub> π*)  | 2.86            | S <sub>1</sub> <sup>1</sup> (n <sub>A</sub> π*)  | 3.21            |
| S <sub>2</sub> <sup>1</sup> (L <sub>b</sub> ππ*) | 2.45            | S <sub>2</sub> <sup>1</sup> (L <sub>b</sub> ππ*) | 2.86            | S <sub>2</sub> <sup>1</sup> (L <sub>b</sub> ππ*) | 2.80            |
| S <sub>3</sub> <sup>1</sup> (n <sub>B</sub> π*)  | 5.49            | S <sub>3</sub> <sup>1</sup> (n <sub>B</sub> π*)  | 3.86            | S <sub>3</sub> <sup>1</sup> (n <sub>B</sub> π*)  | 3.31            |
| S <sub>4</sub> <sup>1</sup> (L <sub>a</sub> ππ*) | 4.15            | S <sub>4</sub> <sup>1</sup> (L <sub>a</sub> ππ*) | 8.67            | S <sub>4</sub> <sup>1</sup> (L <sub>a</sub> ππ*) | 5.88            |

**Table S3.** Geometrical parameters characterizing the nitro group at the obtained critical points. For each <sup>1</sup>(n<sub>A</sub>π\*) minimum and CI, the difference with respect to the ground state minimum are also reported (in blue in case of a negative value, in red for a positive value).

|       | <sup>1</sup> (gs) <sub>min</sub> |                      |                      |               | <sup>1</sup> (n <sub>A</sub> π*) <sub>min</sub> |                      |                      |                  | <sup>1</sup> (n <sub>A</sub> π*/gs) <sub>CI</sub> |                      |                      |                 |
|-------|----------------------------------|----------------------|----------------------|---------------|-------------------------------------------------|----------------------|----------------------|------------------|---------------------------------------------------|----------------------|----------------------|-----------------|
|       | CN (Å)                           | NO <sub>12</sub> (Å) | NO <sub>13</sub> (Å) | ONO (degrees) | CN (Å)                                          | NO <sub>12</sub> (Å) | NO <sub>13</sub> (Å) | ONO (degrees)    | CN (Å)                                            | NO <sub>12</sub> (Å) | NO <sub>13</sub> (Å) | ONO (degrees)   |
| 2NN   | 1.472                            | 1.239                | 1.240                | 124.76        | 1.414<br>-0.058                                 | 1.247<br>+0.008      | 1.393<br>+0.153      | 110.88<br>-13.88 | 1.227<br>-0.245                                   | 1.320<br>+0.081      | 1.318<br>+0.078      | 93.48<br>-31.28 |
| 1NN   | 1.467                            | 1.236                | 1.239                | 125.10        | 1.436<br>-0.031                                 | 1.251<br>+0.015      | 1.372<br>+0.133      | 108.09<br>-17.01 | 1.226<br>-0.241                                   | 1.318<br>+0.082      | 1.318<br>+0.079      | 93.54<br>-31.56 |
| 2M1NN | 1.468                            | 1.241                | 1.240                | 125.46        | 1.437<br>-0.031                                 | 1.379<br>+0.138      | 1.244<br>+0.004      | 109.27<br>-16.19 | 1.277<br>-0.191                                   | 1.318<br>+0.077      | 1.318<br>+0.078      | 93.25<br>-32.21 |

**Table S4.** Cartesian coordinates x, y, z (in Å) of the optimized structures.

## 2NN

### <sup>1</sup>(gs)<sub>min</sub>

C -1.017644 0.217405 -0.026639  
 C -1.454240 1.565466 -0.004995  
 C -0.516787 2.573342 0.074449  
 C 0.872338 2.325371 0.135780  
 C 1.307656 1.014890 0.115245  
 C 0.388247 -0.065920 0.034209  
 C -1.939968 -0.859134 -0.107712  
 C -1.490872 -2.167184 -0.127449  
 C -0.103131 -2.447891 -0.067367  
 C 0.817713 -1.417898 0.012083  
 H -2.508741 1.806918 -0.049916  
 N -0.982402 3.969889 0.096144  
 H 1.561655 3.155800 0.197029  
 H 2.370220 0.798388 0.161459  
 H 1.880735 -1.632933 0.058332  
 H 0.236987 -3.477333 -0.083947

H -2.201965 -2.983318 -0.189164  
H -3.001749 -0.638907 -0.153927  
O -0.119638 4.858001 0.166899  
O -2.203717 4.173879 0.042587

${}^1(\text{n}_A\pi^*)_{\text{min}}$

C -1.009301 0.213228 -0.031457  
C -1.458778 1.557205 -0.037090  
C -0.527485 2.570260 -0.025061  
C 0.867190 2.323234 -0.018461  
C 1.301216 1.020338 -0.002013  
C 0.379044 -0.062384 -0.009196  
C -1.932584 -0.870632 -0.036891  
C -1.483928 -2.168219 -0.021462  
C -0.088209 -2.442535 0.000621  
C 0.817141 -1.415890 0.006192  
H -2.513265 1.788683 -0.048401  
N -0.973371 3.911171 -0.075566  
H 1.569904 3.143367 -0.029853  
H 2.361524 0.807993 0.009303  
H 1.879504 -1.619062 0.023334  
H 0.252796 -3.467671 0.012652  
H -2.189584 -2.986554 -0.026515  
H -2.992175 -0.653939 -0.053136  
O -0.172196 4.823760 0.607527  
O -2.164053 4.282152 -0.081330

$({}^1\text{n}_A\pi^*/\text{gs})_{\text{CI}}$

C 0.000607772 -0.819559 1.41833  
C 0.00171572 -0.390709 0.0656317  
C -0.00133083 1.01873 -0.218734  
C -0.00538776 1.9415 0.857603  
C -0.00637239 1.49157 2.16695  
C -0.00337104 0.103577 2.44816  
C 0.00576769 -1.30935 -1.01579  
C 0.00679207 -0.872135 -2.32793  
C 0.00372143 0.516374 -2.57282  
C -0.000248041 1.45558 -1.56734  
N 0.00462738 0.905306 -3.7363  
O 0.00255809 2.10318 -4.28998  
O 0.00801214 0.280638 -4.89707  
H -0.00249354 2.51098 -1.81183  
H 0.00985579 -1.5601 -3.16137  
H 0.00808521 -2.37363 -0.799452  
H 0.00292435 -1.884 1.63472  
H -0.00420735 -0.236381 3.47923  
H -0.00945849 2.20387 2.98409  
H -0.00770452 3.00484 0.636786

LIIC g5

|   |             |             |             |
|---|-------------|-------------|-------------|
| C | -2.82808231 | -0.48447210 | -0.02353383 |
| C | -1.40739831 | -0.48447210 | -0.02353383 |
| C | -0.71350875 | 0.76356454  | -0.02353383 |
| C | -1.46049017 | 1.97173778  | -0.02310750 |
| C | -2.83955974 | 1.94118396  | -0.02299287 |
| C | -3.52863387 | 0.70067178  | -0.02311186 |
| C | -0.65736550 | -1.69070280 | -0.02318236 |
| C | 0.72129936  | -1.67426539 | -0.02383137 |
| C | 1.37944969  | -0.42413404 | -0.01693937 |
| C | 0.70378349  | 0.77455698  | -0.01913088 |
| N | 2.68925514  | -0.40811206 | -0.03137647 |
| O | 3.50321112  | 0.58934341  | -0.02648298 |
| O | 3.48284016  | -1.46752026 | 0.24180729  |
| H | 1.25267247  | 1.70665484  | -0.01655033 |
| H | 1.29786265  | -2.58796171 | -0.03104132 |
| H | -1.18557643 | -2.63728788 | -0.02571224 |
| H | -3.35276651 | -1.43329533 | -0.02345277 |
| H | -4.61192096 | 0.68986419  | -0.02301920 |
| H | -3.40212287 | 2.86601223  | -0.02302381 |
| H | -0.92830789 | 2.91620131  | -0.02277336 |

1NN

$^1(\text{gs})_{\text{min}}$

|   |           |           |           |
|---|-----------|-----------|-----------|
| C | -1.056021 | 0.224128  | 0.019209  |
| C | -1.433620 | 1.551018  | 0.044958  |
| C | -0.439418 | 2.549621  | 0.094182  |
| C | 0.897185  | 2.192845  | 0.089567  |
| C | 2.663592  | 0.476051  | -0.009148 |
| C | 3.047055  | -0.849540 | -0.090323 |
| C | 2.067049  | -1.866188 | -0.139092 |
| C | 0.718765  | -1.558104 | -0.091805 |
| C | 1.292694  | 0.833598  | 0.030086  |
| C | 0.299535  | -0.204294 | 0.002507  |
| N | -2.140486 | -0.763090 | 0.013523  |
| O | -2.046747 | -1.724520 | 0.785375  |
| O | -3.091442 | -0.554660 | -0.752320 |
| H | -2.486263 | 1.805470  | 0.035692  |
| H | -0.728957 | 3.593578  | 0.135730  |
| H | 1.666399  | 2.958700  | 0.125075  |
| H | 3.409457  | 1.264826  | 0.018990  |
| H | 4.099713  | -1.108930 | -0.121453 |
| H | 2.373039  | -2.903786 | -0.212210 |
| H | -0.015167 | -2.351203 | -0.118235 |

$^1(\text{NAT}^*)_{\text{min}}$

C -1.034544 0.186415 -0.026512  
C -1.424877 1.494996 0.040415  
C -0.439757 2.510539 0.090431  
C 0.886611 2.178513 0.086098  
C 2.676008 0.474937 0.003750  
C 3.069048 -0.833091 -0.078009  
C 2.095418 -1.859220 -0.152209  
C 0.761260 -1.551254 -0.136196  
C 1.299023 0.821302 0.018614  
C 0.337574 -0.197039 -0.047286  
N -2.018100 -0.858151 -0.082563  
O -2.301527 -1.500646 0.952945  
O -3.191424 -0.495434 -0.693144  
H -2.465871 1.749038 0.055371  
H -0.745086 3.538704 0.140713  
H 1.637992 2.945448 0.130054  
H 3.406605 1.261367 0.056451  
H 4.113289 -1.084851 -0.088558  
H 2.406395 -2.885106 -0.221086  
H 0.028307 -2.330928 -0.188960

$(^1n_{\text{A}\pi^*}/\text{gs})_{\text{CI}}$

O -1.91289 -1.91793 -0.0242638  
N -1.9658 -0.603583 0.00881361  
O -3.28153 -0.569087 0.0200437  
C -1.14837 0.315553 0.0251903  
C -1.6485 1.58275 0.060441  
C -0.751741 2.67984 0.112268  
C 0.580913 2.46246 0.100107  
C 1.11539 1.1462 0.0356463  
C 0.24942 0.032348 0.00712343  
C 0.810712 -1.27481 -0.0801376  
C 2.16696 -1.43803 -0.128344  
C 3.03394 -0.313472 -0.0864694  
C 2.52132 0.93313 -0.00709472  
H 3.17114 1.78889 0.0209799  
H 1.26398 3.29145 0.134457  
H -1.14562 3.67744 0.159071  
H -2.70835 1.74268 0.0574733  
H 0.169309 -2.13123 -0.0973943  
H 2.58261 -2.42614 -0.19394  
H 4.09748 -0.461688 -0.119955

LIIC g4

C 0.49895870 -0.95692634 0.04855203  
C 1.86424070 -0.95692634 0.04855203  
C 2.55724228 0.27881158 0.04855203  
C 1.86388478 1.44618001 0.02758786

C -0.27682287 2.68235481 -0.02342883  
C -1.63494257 2.69395440 -0.04213142  
C -2.35464896 1.47149175 -0.02563695  
C -1.69220215 0.27506606 0.01119033  
C 0.44268598 1.45705232 0.01103872  
C -0.26945629 0.24373956 0.03110585  
N -0.12732506 -2.11810382 0.06696344  
O -1.23104471 -2.45096085 -0.50768967  
O 0.48646189 -3.27872653 0.34501619  
H 2.40286650 -1.88340458 0.05307799  
H 3.63081748 0.27922713 0.06015678  
H 2.38551654 2.38564853 0.02211260  
H 0.27638114 3.60379398 -0.03614933  
H -2.16865679 3.62589367 -0.06924573  
H -3.42850726 1.48653064 -0.03980167  
H -2.24411714 -0.64225050 0.03020330

## 2M1NN

$^1(\text{gs})_{\text{min}}$

C -1.034544 0.186415 -0.026512  
C -1.424877 1.494996 0.040415  
C -0.439757 2.510539 0.090431  
C 0.886611 2.178513 0.086098  
C 2.676008 0.474937 0.003750  
C 3.069048 -0.833091 -0.078009  
C 2.095418 -1.859220 -0.152209  
C 0.761260 -1.551254 -0.136196  
C 1.299023 0.821302 0.018614  
C 0.337574 -0.197039 -0.047286  
N -2.018100 -0.858151 -0.082563  
O -2.301527 -1.500646 0.952945  
O -3.191424 -0.495434 -0.693144  
H -2.465871 1.749038 0.055371  
H -0.745086 3.538704 0.140713  
H 1.637992 2.945448 0.130054  
H 3.406605 1.261367 0.056451  
H 4.113289 -1.084851 -0.088558  
H 2.406395 -2.885106 -0.221086  
H 0.028307 -2.330928 -0.188960

$^1(\text{n}_A\text{T}^*)_{\text{min}}$

C 0.286700 -0.175117 0.000549  
C -1.087067 0.242109 0.056911  
C -1.465672 1.559356 0.055433  
C -0.434111 2.545326 0.007844  
C 0.882546 2.194824 -0.040681  
C 1.277828 0.825339 -0.046826  
C 0.688919 -1.537130 -0.008863  
C 2.018814 -1.864594 -0.061909



C 3.006921 -0.854872 -0.106560  
C 2.643331 0.450646 -0.099253  
N -2.120906 -0.753918 0.109360  
O -2.307995 -1.407390 -1.090668  
O -2.186655 -1.577397 1.039892  
C -2.898550 2.026497 0.114928  
H -0.714602 3.582796 0.011269  
H 1.642383 2.954252 -0.075735  
H 3.390227 1.223219 -0.133022  
H 4.045419 -1.127528 -0.146337  
H 2.314212 -2.897314 -0.068920  
H -0.047291 -2.314136 0.025844  
H -3.071897 2.576729 1.036367  
H -3.105147 2.698848 -0.713301  
H -3.601566 1.207400 0.073626

$(^1n_{AT}^*/gs)_{Cl}$

C 0.272073 -0.153281 -0.002602  
C -1.091838 0.283566 0.074536  
C -1.450195 1.608386 0.099357  
C -0.405486 2.575952 0.063956  
C 0.905953 2.203267 -0.002866  
C 1.276559 0.828854 -0.039340  
C 0.651080 -1.525781 -0.040970  
C 1.956425 -1.873015 -0.110781  
C 2.971576 -0.881855 -0.145883  
C 2.639583 0.427606 -0.111242  
N -2.024989 -0.587864 0.110505  
O -3.338918 -0.504337 0.179565  
O -2.034641 -1.905268 0.092417  
C -2.879112 2.082644 0.198264  
H -0.666982 3.618014 0.089807  
H 1.677709 2.950451 -0.031059  
H 3.401835 1.185199 -0.136989  
H 4.002233 -1.179669 -0.199498  
H 2.231498 -2.911192 -0.138976  
H -0.101753 -2.287584 -0.011929  
H -3.097418 2.402487 1.214302  
H -3.035138 2.933908 -0.456874  
H -3.589133 1.312571 -0.069741

LIIC g6

C -0.62166895 -0.15558473 -0.02109927  
C 0.81343405 -0.15558473 -0.02109927  
C 1.55867138 0.99632831 -0.02109927  
C 0.85760063 2.23741176 -0.03797372  
C -0.50607652 2.28311671 -0.04481189  
C -1.28003510 1.08731743 -0.03509385  
C -1.40216813 -1.34536661 -0.00948272

|   |             |             |             |
|---|-------------|-------------|-------------|
| C | -2.75897085 | -1.27605727 | -0.01284850 |
| C | -3.42030664 | -0.02262267 | -0.02920301 |
| C | -2.70035712 | 1.12244068  | -0.03984334 |
| N | 1.46314425  | -1.31646044 | -0.00987843 |
| O | 2.61463442  | -1.58138834 | 0.61929939  |
| O | 1.04667928  | -2.49486463 | -0.34177425 |
| C | 3.06711277  | 1.01687750  | -0.03346108 |
| H | 1.42576509  | 3.14961513  | -0.04472935 |
| H | -1.01375579 | 3.23023396  | -0.05598206 |
| H | -3.19439612 | 2.07715369  | -0.05255974 |
| H | -4.49400892 | 0.01145329  | -0.03338252 |
| H | -3.33937770 | -2.18003260 | -0.00407470 |
| H | -0.91865898 | -2.30126279 | 0.00023277  |
| H | 3.42808200  | 1.31917589  | -1.01349275 |
| H | 3.43548435  | 1.73746677  | 0.69047731  |
| H | 3.49493369  | 0.05178531  | 0.19855433  |

### NB

$(^1n_{AT}^*/gs)_{CI}$

|   |            |             |             |
|---|------------|-------------|-------------|
| H | 0.00000000 | -2.19262950 | 0.06630733  |
| C | 0.00000000 | -1.27354478 | -0.47794242 |
| C | 0.00000000 | -1.22635061 | -1.83162392 |
| C | 0.00000000 | 0.00000000  | -2.54000347 |
| C | 0.00000000 | 1.22635061  | -1.83162392 |
| C | 0.00000000 | 1.27354478  | -0.47794242 |
| C | 0.00000000 | 0.00000000  | 0.29115308  |
| H | 0.00000000 | -2.14642158 | -2.38821722 |
| H | 0.00000000 | 0.00000000  | -3.61029533 |
| H | 0.00000000 | 2.14642158  | -2.38821722 |
| H | 0.00000000 | 2.19262950  | 0.06630733  |
| N | 0.00000000 | 0.00000000  | 1.52566436  |
| O | 0.00000000 | 0.97241177  | 2.42307583  |
| O | 0.00000000 | -0.97241177 | 2.42307583  |

### LIIC g4

|   |             |             |             |
|---|-------------|-------------|-------------|
| H | -1.91525130 | 1.03599467  | -0.00033812 |
| C | -0.84532830 | 1.03599467  | -0.00033812 |
| C | -0.11697513 | 2.19948306  | -0.00033812 |
| C | 1.28901624  | 2.18192680  | -0.00009087 |
| C | 1.97201502  | 0.95494116  | 0.00115964  |
| C | 1.29242938  | -0.23954257 | 0.00309521  |
| C | -0.14714920 | -0.22381812 | 0.00183725  |
| H | -0.63384869 | 3.14179875  | -0.00106345 |
| H | 1.83825623  | 3.10285717  | -0.00089866 |
| H | 3.04668877  | 0.94648889  | 0.00099002  |
| H | 1.81236650  | -1.17544479 | 0.00410700  |
| N | -0.83050804 | -1.34690541 | 0.00469065  |
| O | -0.29252500 | -2.57821864 | 0.01754161  |
| O | -2.08231291 | -1.55643972 | -0.02598926 |
